# Supplementary material for: INT-767—A Dual Farnesoid-X Receptor (FXR) and Takeda G Protein-Coupled Receptor-5 (TGR5) Agonist Improves Survival in Rats and Attenuates Intestinal Ischemia Reperfusion Injury
Source: MDPI journal article supplement (doi:10.3390/ijms241914881), 2023-10-04
Supplement: s1 [file s1]

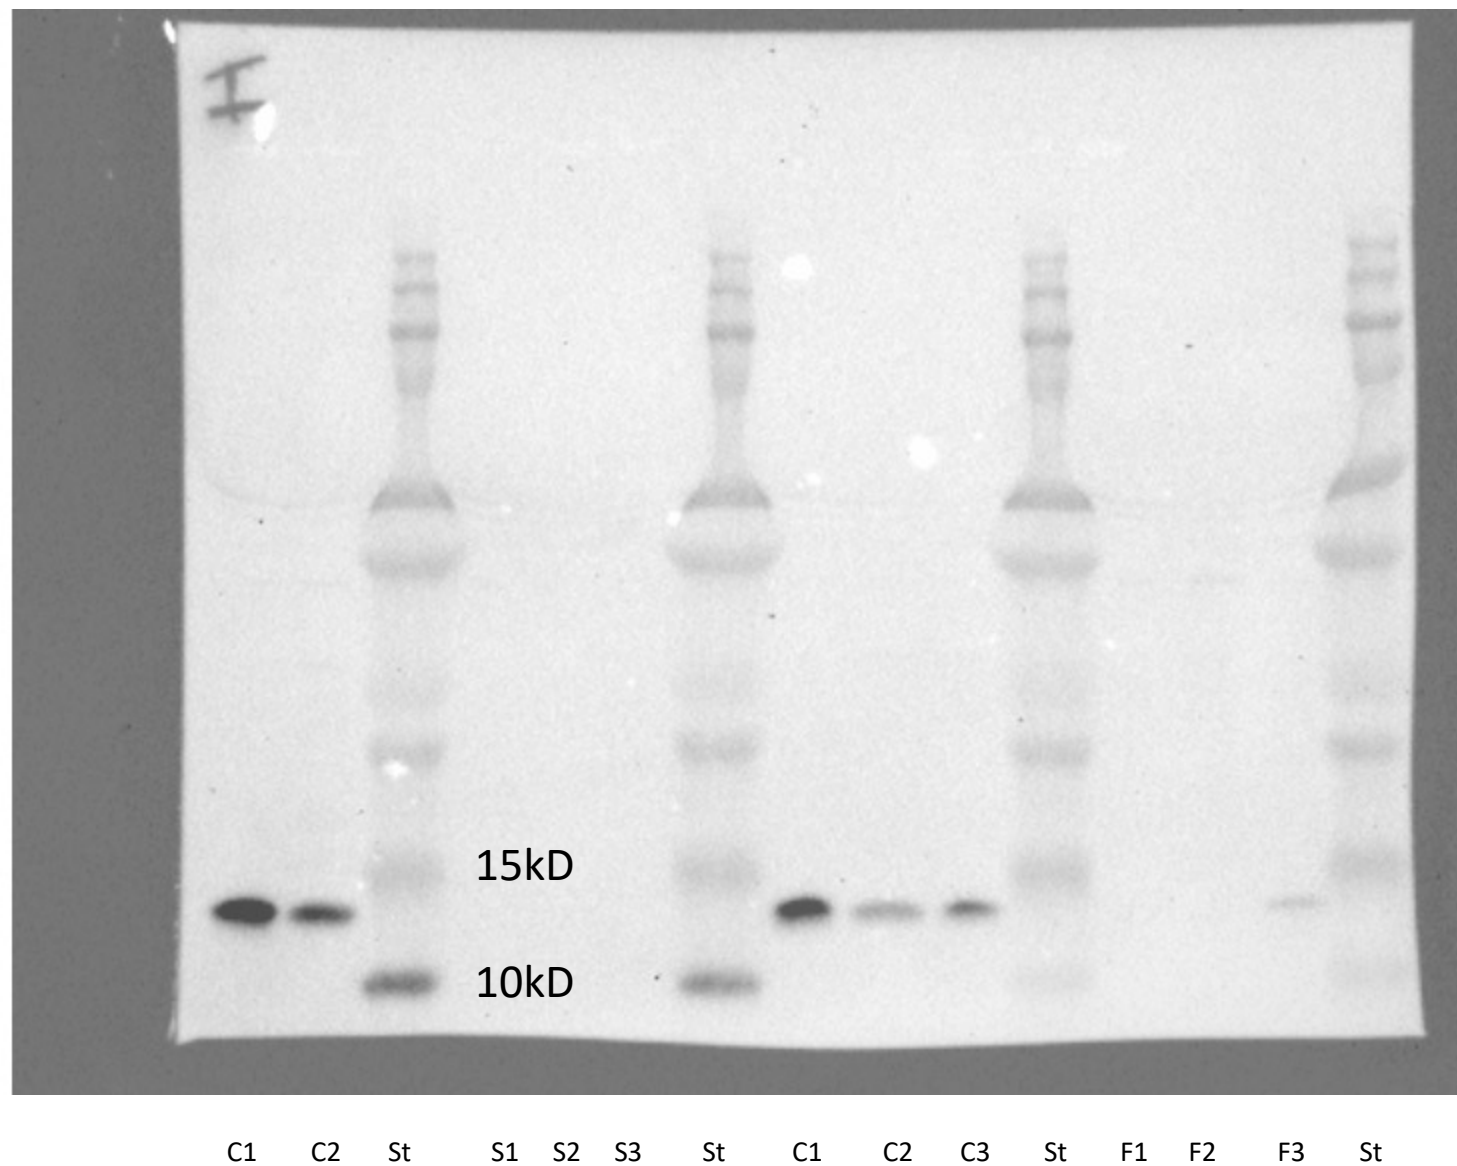

**Legend:**

C = control

S = sham

F = FXR

St = standard

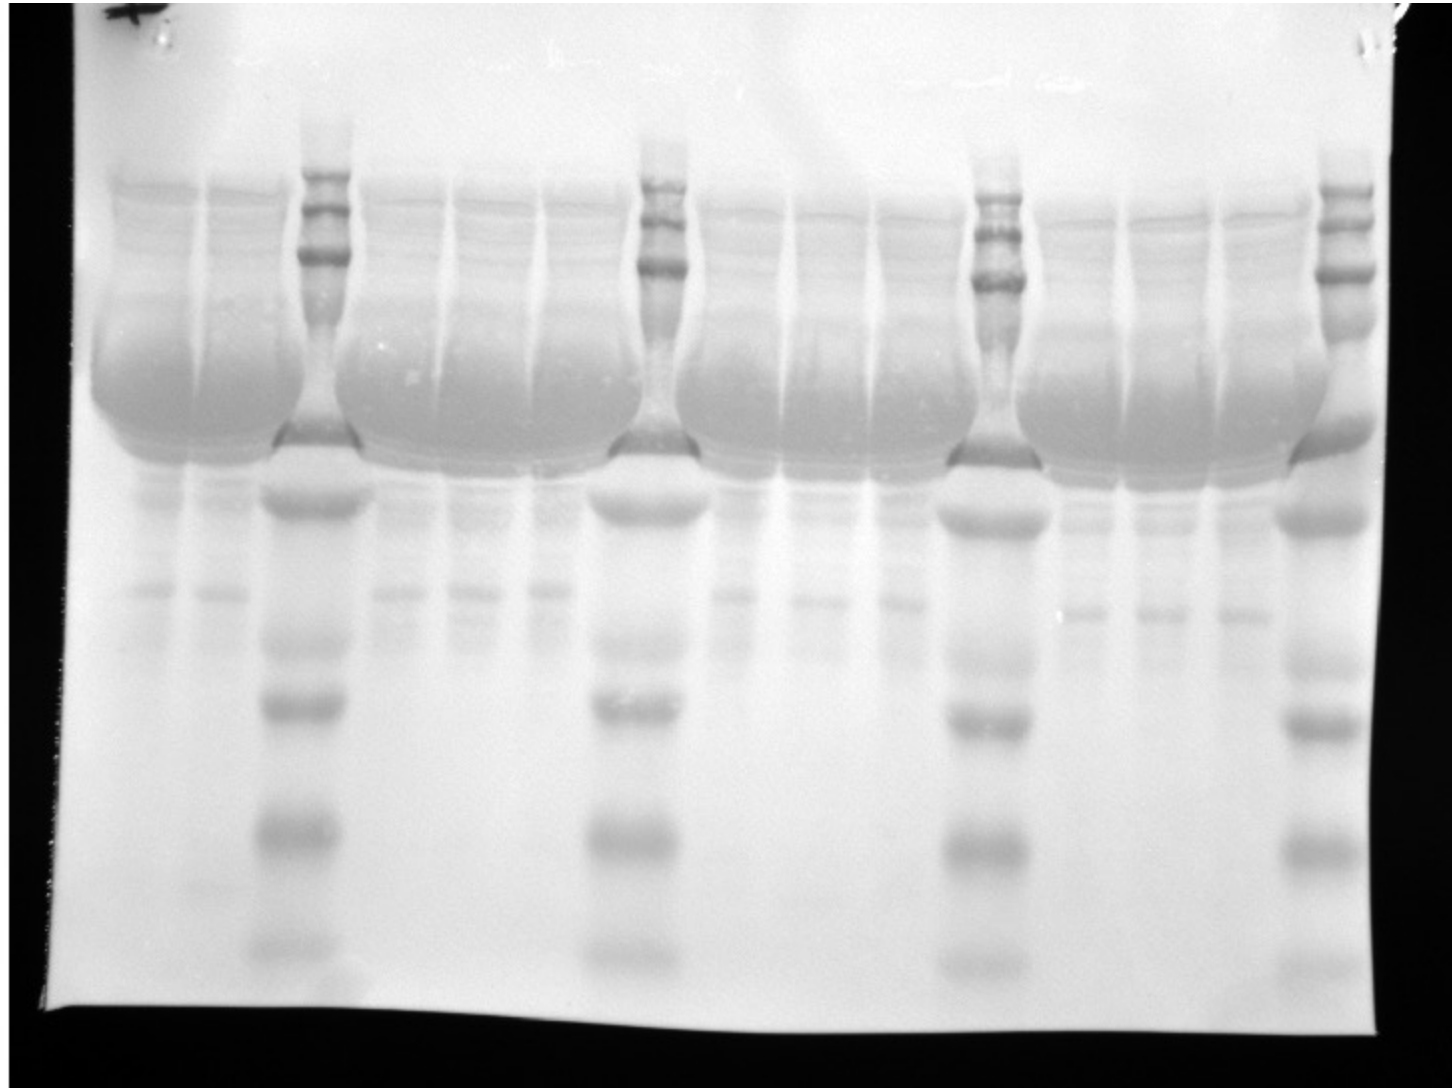

**Ponceau S  
staining**

Blot 1

C = control

S = sham

F = FXR

St = standard

C1 C2 St S1 S2 S3 St C1 C2 C3 St F1 F2 F3 St

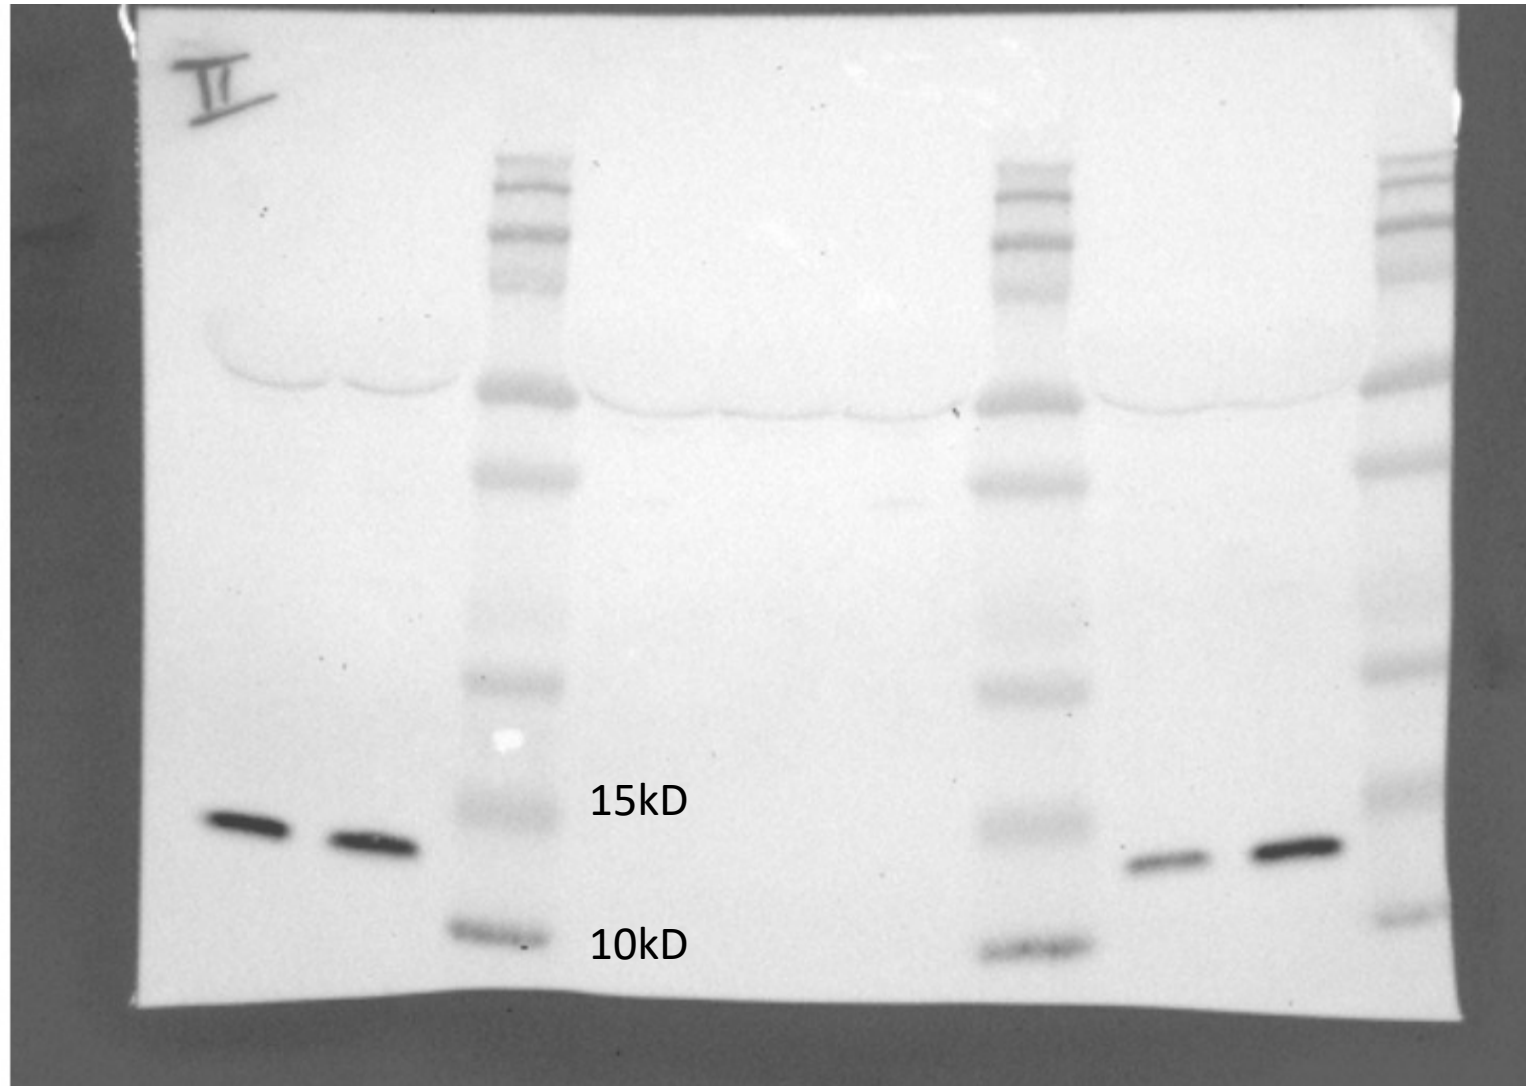

**Legend:**

C = control

S = sham

F = FXR

St = standard

C1

C2

St

S4

S5

S6

St

C4

C5.

St

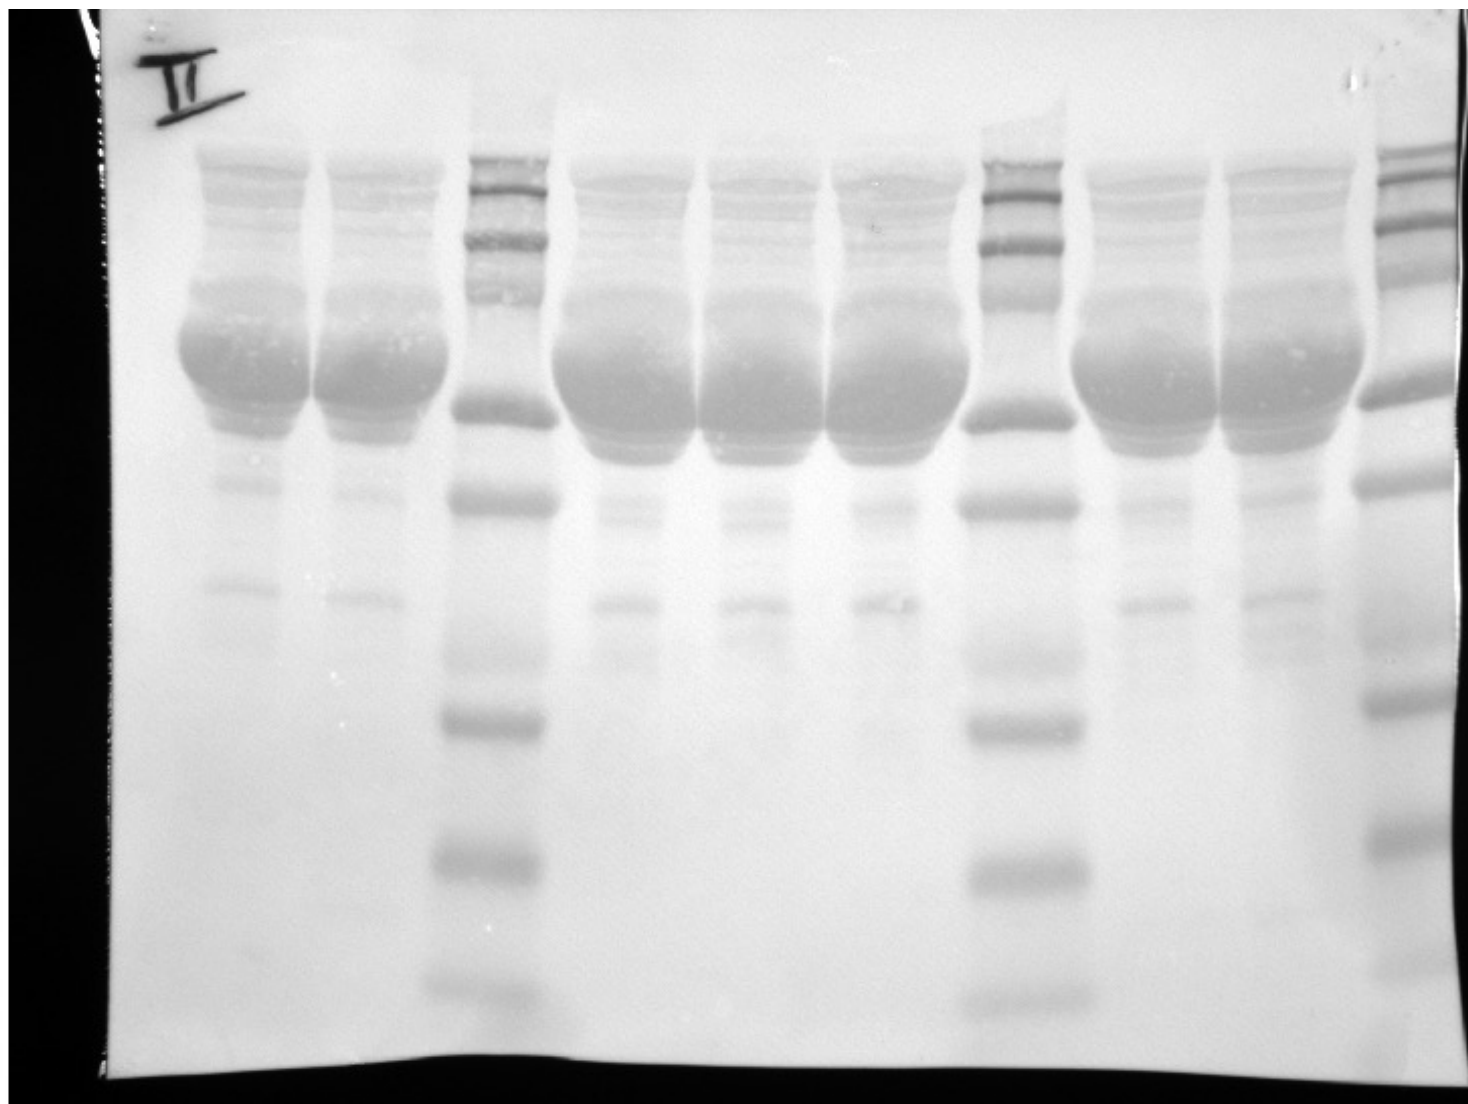

**Ponceau S  
staining**

Blot 2

C = control

S = sham

F = FXR

St = standard

C1

C2

St

S4

S5

S6

St

C4

C5.

St

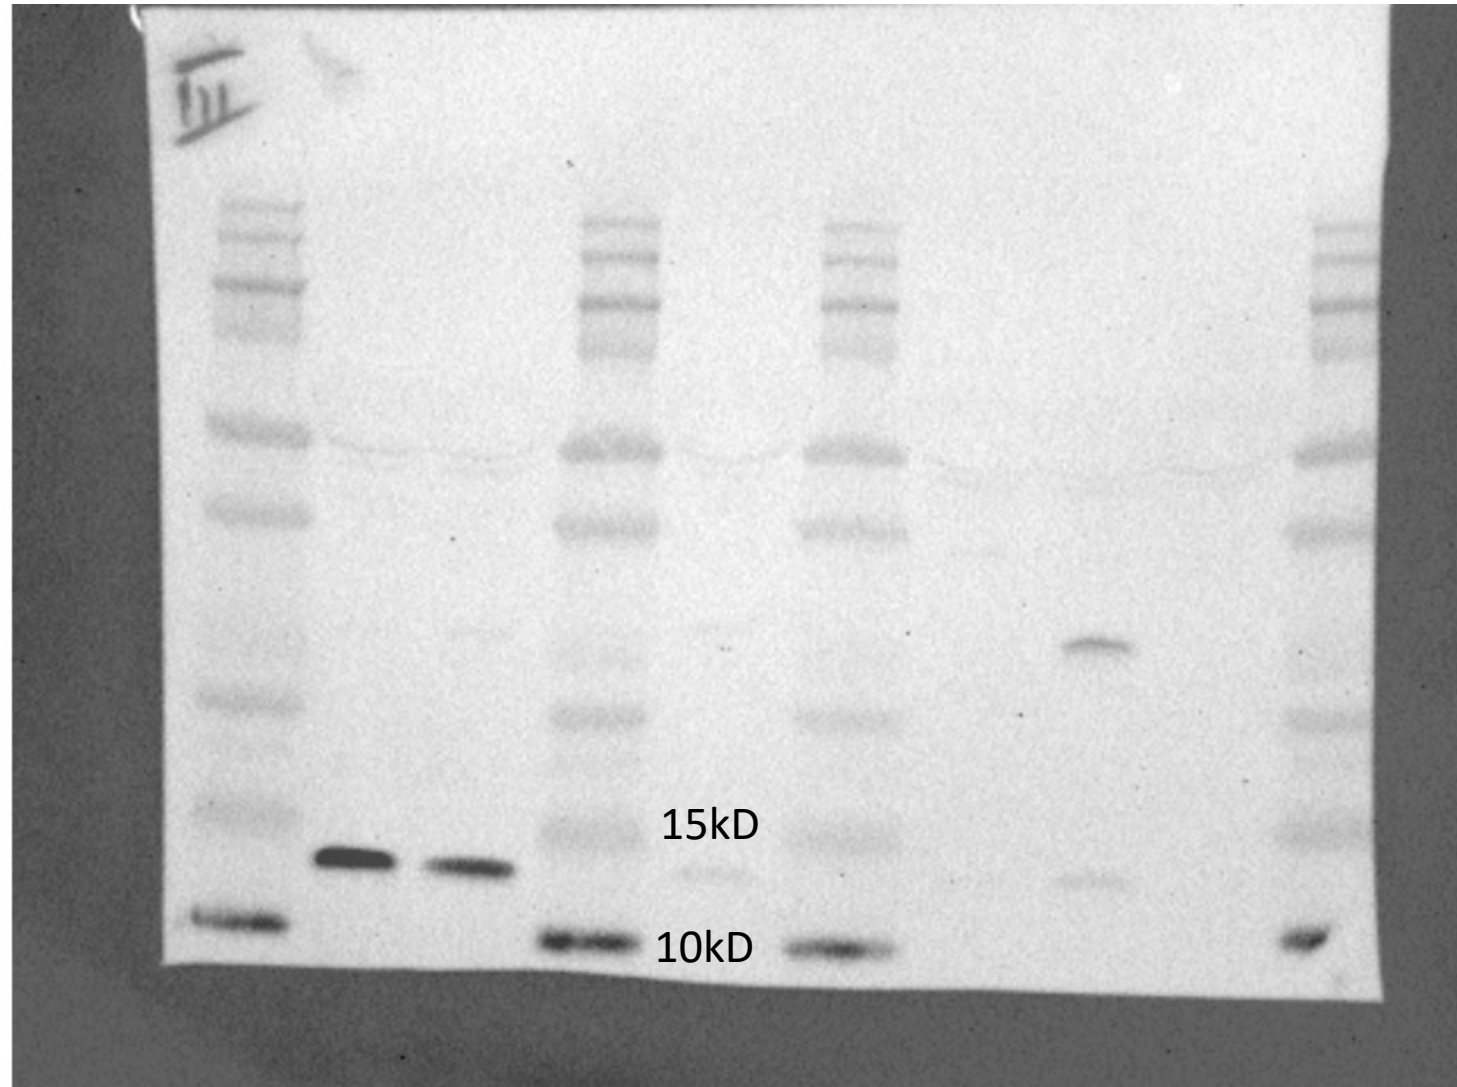

**Legend:**

C = control

S = sham

F = FXR

St = standard

St

C1

C2

St

C6

St

F4

F5

F6

St

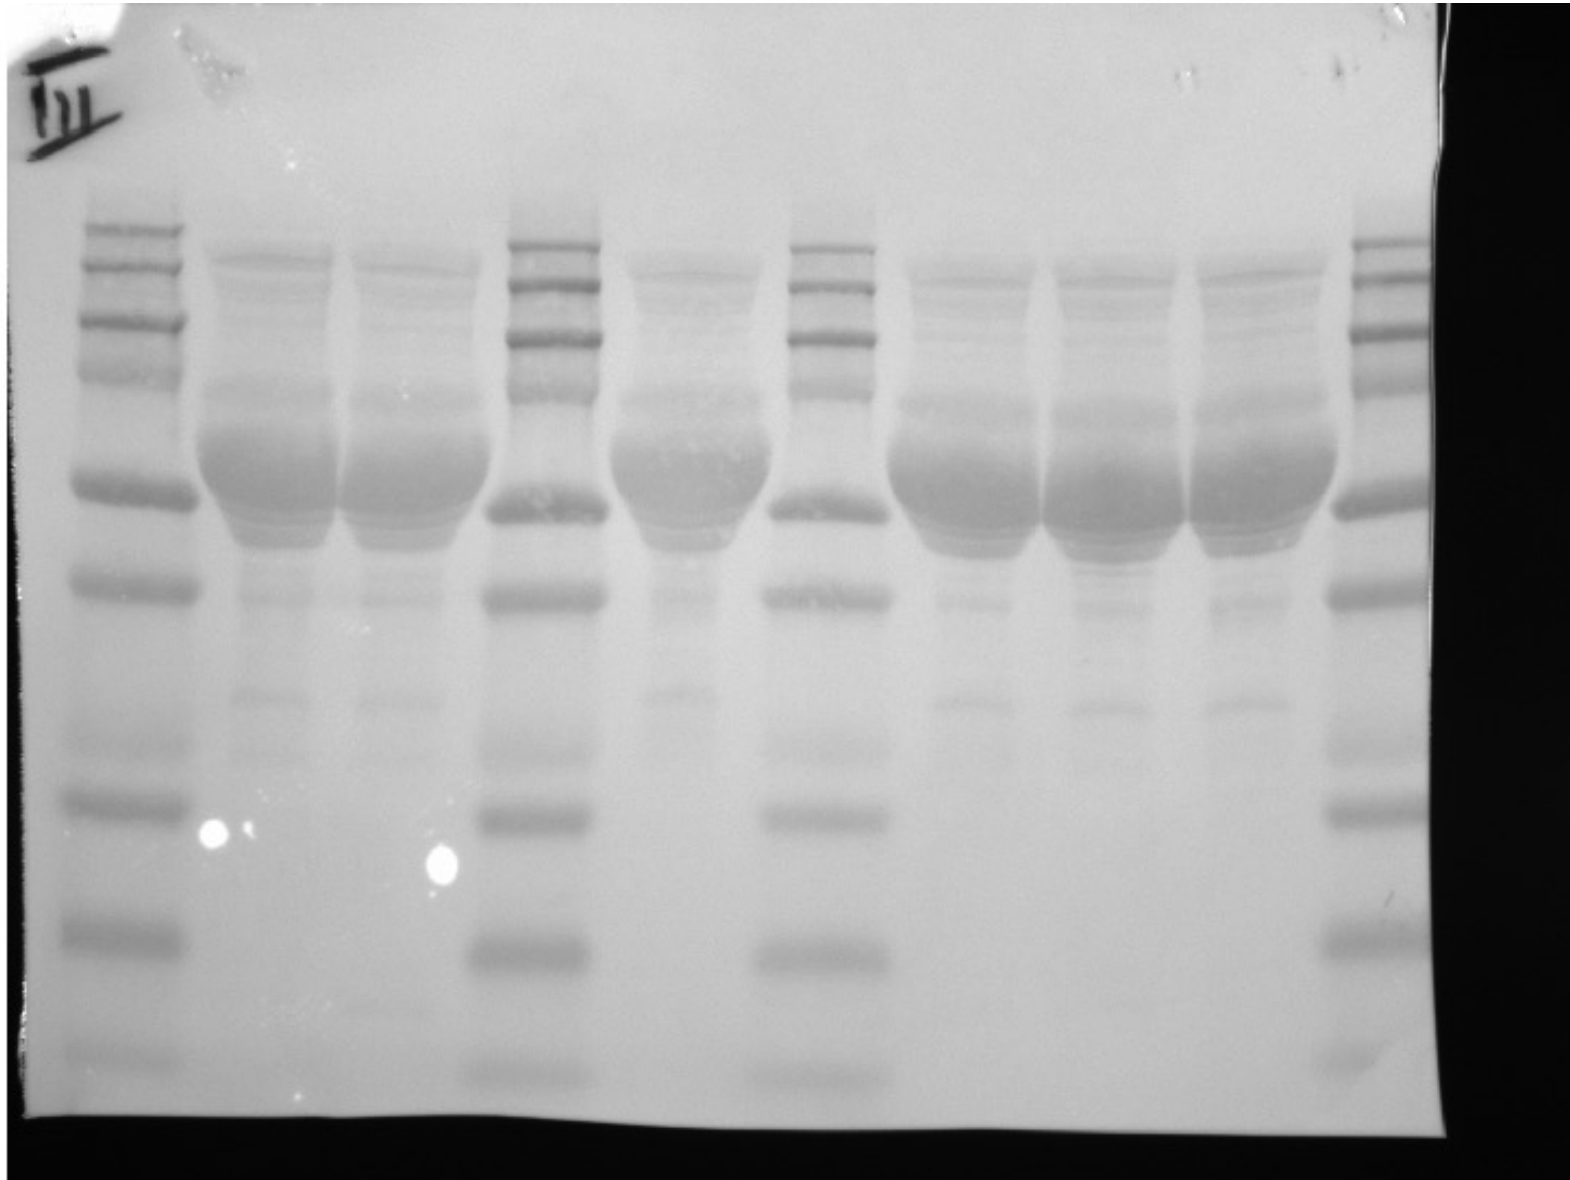

**Ponceau S  
staining**

Blot 3

C = control

S = sham

F = FXR

St = standard

St

C1

C2

St

C6

St

F4

F5

F6

St
