# Supplementary material for: INT-767—A Dual Farnesoid-X Receptor (FXR) and Takeda G Protein-Coupled Receptor-5 (TGR5) Agonist Improves Survival in Rats and Attenuates Intestinal Ischemia Reperfusion Injury
Source: MDPI journal article supplement (doi:10.3390/ijms241914881), 2023-10-04
Supplement: s1 [file s1]

## Supplementary file S2 – Sample size power calculation

The rationale for the number in each group was based on power calculation which were based on predictions from the previous study from this model<sup>1</sup>.

The primary end-point chosen was the level of histological damage, calculated by the Park-Chiu score (0-8). The expected Park-Chiu score for histological damage (range: 0-8) was 5 ( $\pm 1.5$ ) in the control group versus 2.5 in the treated group in our previous study. This resulted in a calculated group size of 6 (continuous endpoint, with an alpha of 0.05 and power of 80%).

$$k = \frac{n_2}{n_1} = 1$$
$$n_1 = \frac{(\sigma_1^2 + \sigma_2^2/K)(z_{1-\alpha/2} + z_{1-\beta})^2}{\Delta^2}$$
$$n_1 = \frac{(1.5^2 + 1.5^2/1)(1.96 + 0.84)^2}{2.5^2}$$
$$n_1 = 6$$
$$n_2 = K * n_1 = 6$$

$\Delta = |\mu_2 - \mu_1|$  = absolute difference between two means  
 $\sigma_1, \sigma_2$  = variance of mean #1 and #2  
 $n_1$  = sample size for group #1  
 $n_2$  = sample size for group #2  
 $\alpha$  = probability of type I error (usually 0.05)  
 $\beta$  = probability of type II error (usually 0.2)  
 $z$  = critical Z value for a given  $\alpha$  or  $\beta$   
 $k$  = ratio of sample size for group #2 to group #1

Calculation were performed using an online sample size calculator:

<https://clincalc.com/stats/samplesize.aspx>

### References:

1. Ceulemans LJ, Verbeke L, Decuypere JP, et al. Farnesoid x receptor activation attenuates intestinal ischemia reperfusion injury in rats. *PLoS One*. 2017;12(1):1-17. doi:10.1371/journal.pone.0169331
